# Supplementary material for: A DNA barcode inventory of the genus Ulva (Chlorophyta) along two Italian regions: updates and considerations
Source: publisher site journal article supplement (doi:10.1515/bot-2023-0071), 2024-06-21
Supplement: Supplementary file 1 [file j_bot-2023-0071_suppl_002.docx]

**Supplementary Table 2**: Overview of *Ulva* species recorded in the Lagoon of Venice on the basis of morphological and/or molecular data, in the last 85 years. (** first record; + misapplied name: reported as *Ulva lactuca* var. *latissima* (L.) Ardissone, it probably refers to the *Ulva lactuca* fo. *latissima* of Schiffner).

|  | Schiffner and Vatova (1938) | Sighel  (1938) | Pignatti  (1962) | Sfriso  (1987) | Sfriso and Curiel (2007) | Sfriso  (2010b) | Manghisi et al. (2011) | Wolf et al.  (2012) | Armeli Minicante (2013) | This study |
| --- | --- | --- | --- | --- | --- | --- | --- | --- | --- | --- |
| Source | Morphology | Morphology | Literature and morphology | Morphology | Literature and morphology | Morphology | Morphology | Molecular | Morphology and molecular | Molecular |
| Blade-forming | *U. lactuca* f. *genuina* | *U. lactuca* var. *latissima* + | *U. lactuca* f. *myriotrema* | *U. rigida* | *U. laetevirens* | *U. rigida* | *U. australis*** (as *U. pertusa*) | *U. australis* (as *U. pertusa*) | *U. australis* | *U. australis* |
| *U. lactuca* f. *latissima* | *U. lactuca* var. *rigida* | *U. lactuca* f. *lacinulata* | *U. lactuca (*as *U. fasciata**)* | *U. fasciata* | *U. fasciata* |  | *U. californica*** | *U. lactuca (as U. fasciata)* | *U. californica* |
| *U. lactuca* f. *lacinulata* |  |  |  | *U. rotundata* | *U. laetevirens* |  | *U. rigida* | *U. lacinulata (*as *U. laetevirens)* | *U. lacinulata* |
| *U. lactuca* var. *lapathifolia* |  |  |  |  | *U. curvata* |  |  |  | *U. lactuca* |
| *U. lactuca* var. *laciniata* f. *australis* |  |  |  |  | *U. rotundata* |  |  |  |  |
| *U. lactuca* var. *rosulans* f. *nana* |  |  |  |  |  |  |  |  |  |
| *U. lactuca* var. *rosulans* |  |  |  |  |  |  |  |  |  |
| *U. lactuca* var. *rigida* |  |  |  |  |  |  |  |  |  |
| Tubeforming | *E. flexuosa* | *U. Enteromorpha* v. *lanceolata* | *E. compressa* | *U. compressa* | *U. compressa* | *U. compressa* |  | *U. compressa* | *U. compressa* | *U. flexuosa* subsp. *flexuosa* |
| *E. tubulosa* | *U. Enteromorpha* v. *compressa* | *E. intestinalis* | *U. intestinalis* | *U. intestinalis* | *U. intestinalis* |  | *U. flexuosa* | *U. linza* | *“U. prolifera/procera”* |
| *E. prolifera* | *U. Enteromorpha* v. *intestinalis* | *E. linza* | *U. linza* | *U. linza* | *U. linza* |  | *Ulva* sp. B15b |  | *U. compressa* |
| *E. intestinalis* |  | *E. clathrata* | *U. ralfsii* | *U. ralfsii* | *U. ralfsii* |  |  |  | *Ulva* sp. 1 |
| *E. linza* |  |  | *U. flexuosa* | *U. flexuosa* | *U. flexuosa* |  |  |  |  |
| *E. minima* |  |  | *U. kylinii* | *U. kylinii* | *U. kylinii* |  |  |  |  |
| *E. compressa* |  |  | *U. clathrata* | *U. clathrata* | *U. clathrata* |  |  |  |  |
| *E. marginata* |  |  | *U. prolifera* | *U. prolifera* | *U. prolifera* |  |  |  |  |
| *E. lingulata* |  |  |  | *U. curvata* | *U. paradoxa* |  |  |  |  |
| *E. crinita* |  |  |  | *U. paradoxa* |  |  |  |  |  |
| *E. fucicola* |  |  |  |  |  |  |  |  |  |
| *E. plumosa* |  |  |  |  |  |  |  |  |  |
| *E. erecta* |  |  |  |  |  |  |  |  |  |
| *E. clathrata* |  |  |  |  |  |  |  |  |  |
| *E. fulvescens* |  |  |  |  |  |  |  |  |  |
